# Supplementary material for: ΔNp63 activates the Fanconi anemia DNA repair pathway and limits the efficacy of cisplatin treatment in squamous cell carcinoma
Source: PubMed Central journal article supplement — Nucleic Acids Res. 2016 Jan 26;44(7):3204–18. doi: 10.1093/nar/gkw036 (PMC4838363; doi:10.1093/nar/gkw036), 2016-01-26
Supplement: supp_gkw036_nar-02582-d-2015-File009.pdf [file supp_gkw036_nar-02582-d-2015-File009.pdf]

**$\Delta$ Np63 activates the Fanconi anemia DNA repair pathway and  
limits the efficacy of cisplatin treatment in squamous cell carcinoma**

Anne Catherine Bretz, Miriam P. Gittler, Joël P. Charles, Niklas Gremke, Ines Eckhardt, Marco Mernberger, Robert Mandic, Jürgen Thomale, Andrea Nist, Michael Wanzel and Thorsten Stiewe

|                                                                                                                                                         |    |
|---------------------------------------------------------------------------------------------------------------------------------------------------------|----|
| SUPPLEMENTARY FIGURES (S1-S7).....                                                                                                                      | 2  |
| Supplementary Figure S1: High level p63 expression in squamous cell carcinomas .....                                                                    | 2  |
| Supplementary Figure S2: Expression of p53 family members in HNSCC cell lines .....                                                                     | 3  |
| Supplementary Figure S3: Regulation of proliferation and cisplatin response by $\Delta$ Np63 is independent of TAp73.....                               | 5  |
| Supplementary Figure S4: DIP method for quantification of cell death on a single cell level .....                                                       | 7  |
| Supplementary Figure S5: Cell death response to cisplatin of G1-arrested cells.....                                                                     | 8  |
| Supplementary Figure S6: Identification of $\Delta$ Np63-regulated pathways in SCC by transcriptome-wide profiling .....                                | 9  |
| Supplementary Figure S7: Expression of FANCD2 and RAD18 during the cell cycle.....                                                                      | 11 |
| Supplementary Figure S8: Enhancer-associated histone modifications of the <i>FANCD2</i> –10kb region .....                                              | 12 |
| Supplementary Figure S9: Depletion of multiple FA pathway components sensitizes SCC cells to cisplatin.....                                             | 14 |
| Supplementary Figure S10: Ectopic expression of FANCD2 is not sufficient to sustain proliferation of $\Delta$ Np63-depleted cells .....                 | 15 |
| Supplementary Figure S11: Ectopic expression of FANCD2 is not sufficient to rescue $\Delta$ Np63-depleted cells from cisplatin-induced cell death ..... | 14 |
| SUPPLEMENTARY METHODS.....                                                                                                                              | 17 |
| siRNA .....                                                                                                                                             | 17 |
| Antibodies.....                                                                                                                                         | 18 |
| Oligonucleotides.....                                                                                                                                   | 19 |
| SUPPLEMENTARY REFERENCES.....                                                                                                                           | 20 |

## SUPPLEMENTARY FIGURES (S1-S7)

## Supplementary Figure S1: High level p63 expression in squamous cell carcinomas

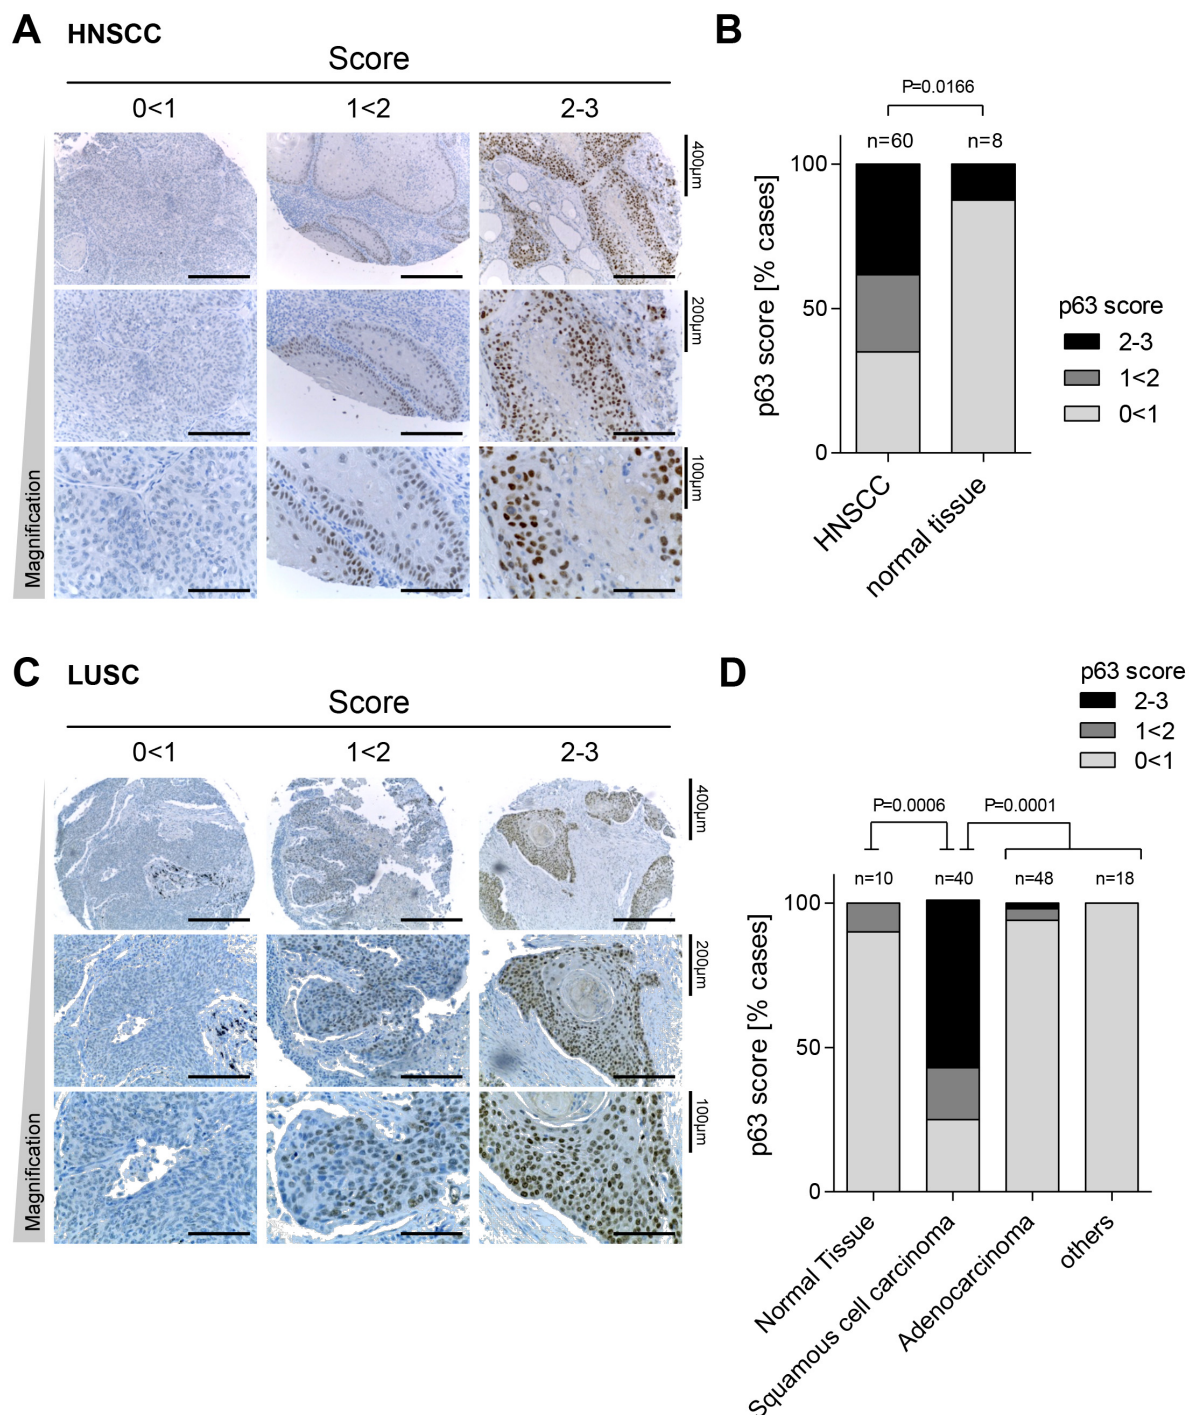

(A-D) Tissue microarrays of paraffin-embedded SCC samples (A, B) HNSCC; (C, D) LUSC were immunostained for p63. Protein levels were scored as low (0<1), intermediate (1<2) and high (2-3). (A) and (C), Representative images. (B) and (D), Distribution of p63 scores in tumor and normal tissues. n=number of samples analyzed; statistical significance tested by  $\chi^2$  test.

## Supplementary Figure S2: Expression of p53 family members in HNSCC cell lines

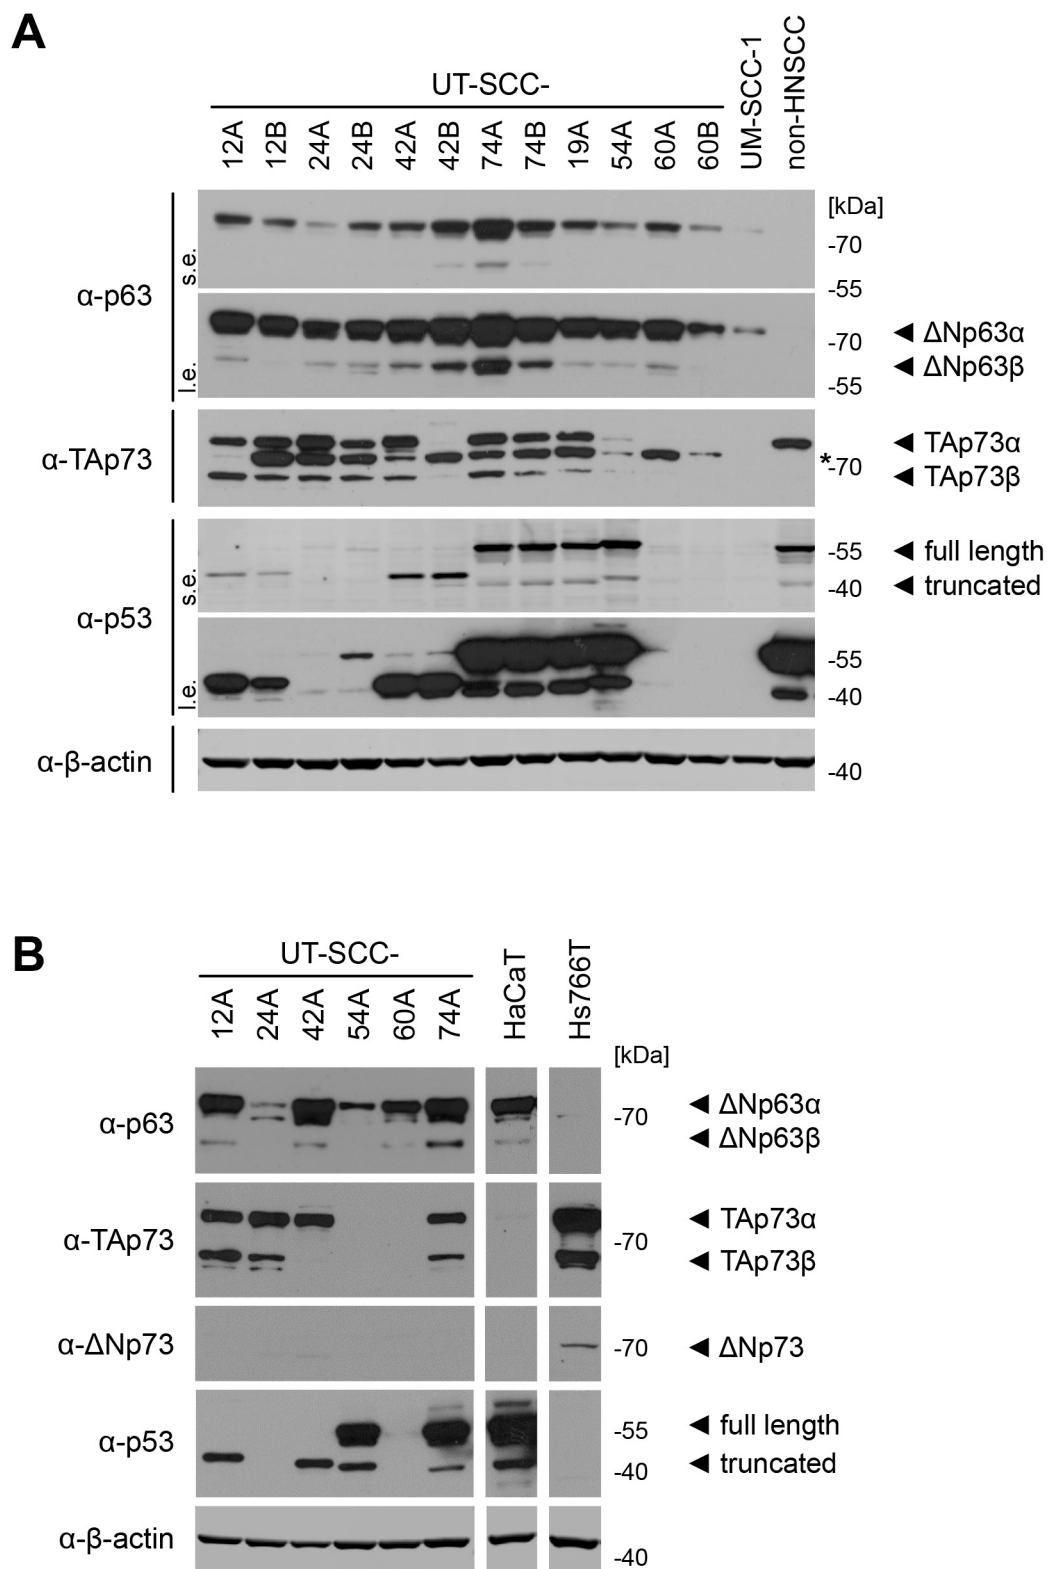

(A) Western Blot of a panel of established HNSCC cell lines evaluating p63, TAp73 and p53 expression. Arrows indicate isoforms previously validated by RNAi experiments (data not shown). non-HNSCC: A7 melanoma cell line. (B) Cell lines from A selected for further experiments were

analyzed in addition for expression of the  $\Delta$ Np73 isoform. The human keratinocyte cell line HaCaT was used as a positive control for p63 expression, the pancreatic cancer cell line Hs766T for TAp73 and  $\Delta$ Np73.

$\beta$ -actin: loading control, s.e. short exposure, l.e. long exposure, \* non-specific bands.

### Supplementary Figure S3: Regulation of proliferation and cisplatin response by $\Delta$ Np63 is independent of TAp73.

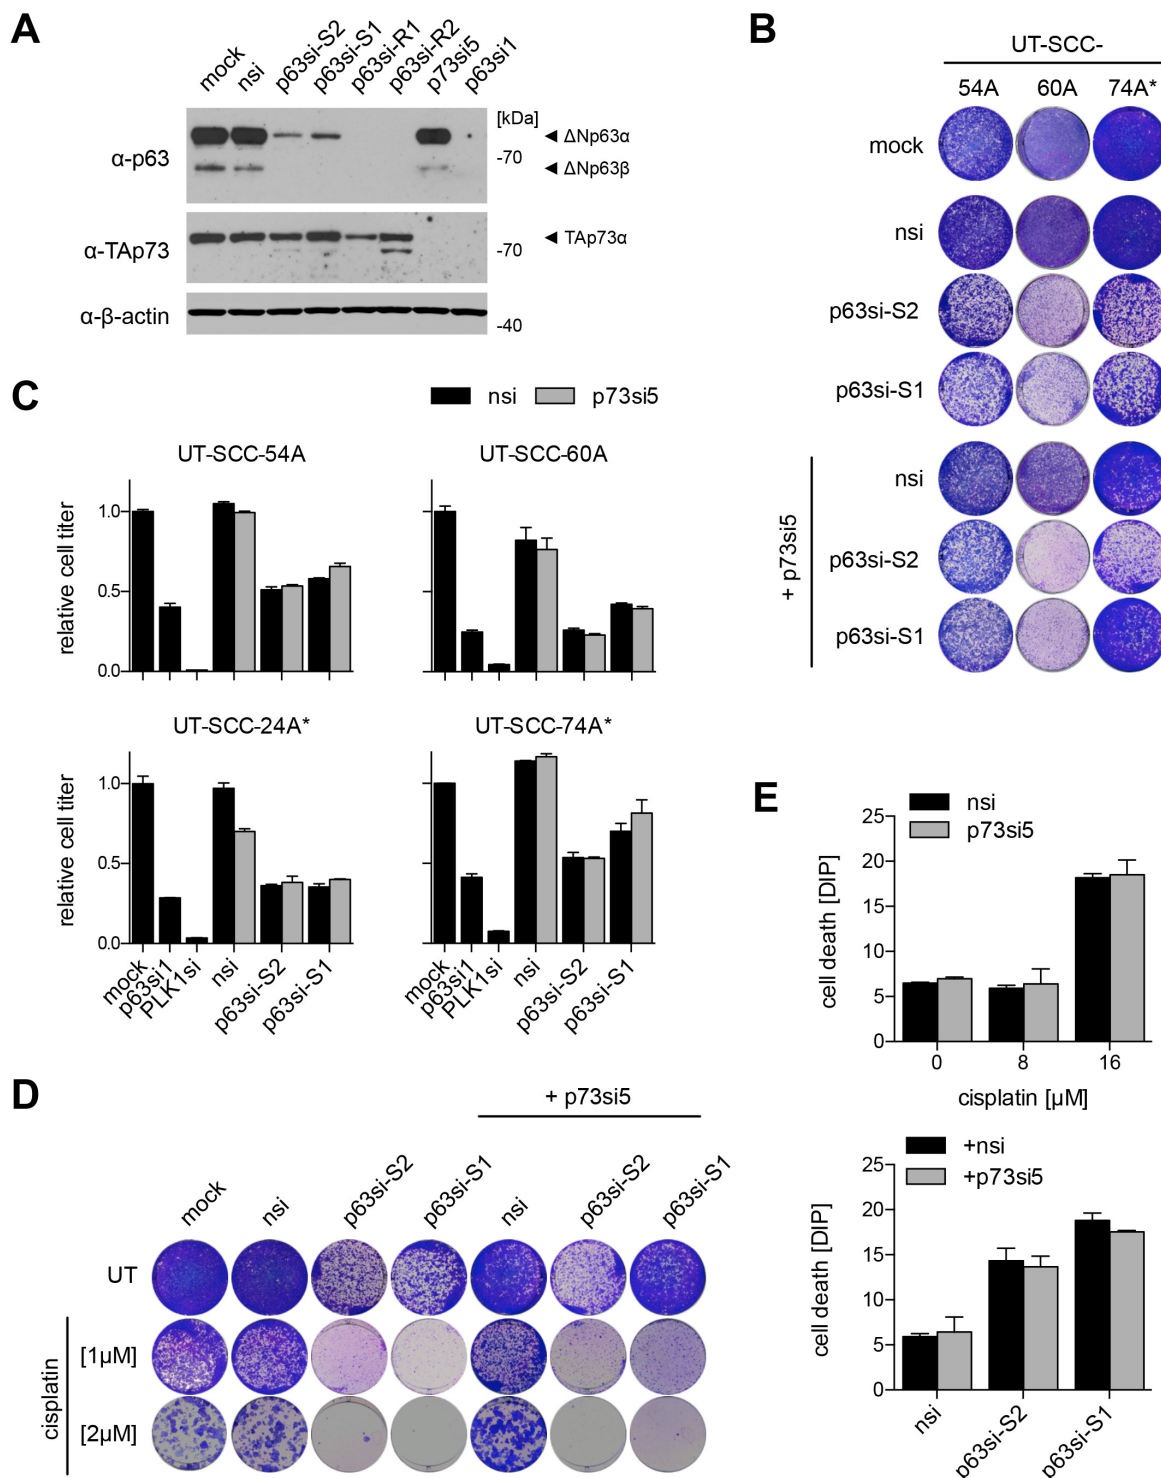

HNSCC cell lines were transfected with p63-targeting (p63si-S1, -S2, -R1, -R2) siRNAs with or without co-depletion of p73 (p63si1, p73si5). **(A)** Western Blot analyzing knockdown efficiency and specificity of siRNAs targeting p63 and p73.  $\beta$ -actin is shown as loading control. **(B)** Colony

formation of HNSCC cell lines following p63/p73 depletion. **(C)** Relative cell titer of p63-depleted HNSCC cell lines. Comparison of p73si5- and nsi- co-transfected samples is shown. Bars show relative cell titer as mean +SD (n=3) normalized to mock-treated cells. PLK1si was used as a positive control. **(D)** Colony formation following cisplatin treatment of p63/p73 depletion. Co-depletion of p73 does not rescue from p63si-induced sensitization towards cisplatin. **(E)** Cell death measurement by DAPI intensity per pixel [DIP] analysis (see Supplementary Fig. 3). UT-SCC-74A were transfected with siRNAs for 48 h, treated with cisplatin at indicated concentration for 24 h and analyzed by DIP. Each bar shows mean +SD (n=2). Top: p73 depletion has no effect on cisplatin response. Bottom: p73 co-depletion does not rescue p63si-induced sensitization towards cisplatin.

\* TAp73 high-expressing cell line.



**Supplementary Figure S5: Cell death response to cisplatin of G1-arrested cells**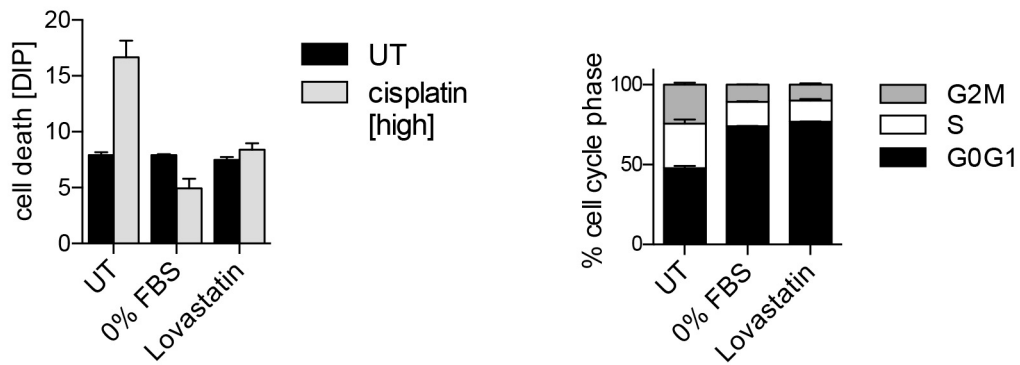

UT-SCC-74A were arrested in G0/G1-phase by Lovastatin treatment [40  $\mu$ M] or serum-deprivation (0% FBS) for 48 h followed by cisplatin treatment for 24 h. *Left*: Cell death analysis by DIP (mean +SD, n=4). *Right*: Cell cycle analysis of propidium iodide-stained cells by flow cytometry prior to cisplatin treatment (mean +SD, n=3).





of the Molecular Signatures Database MSigDB (2) were analyzed for enrichment and visualized by Cytoscape using the Enrichment Map Plugin (3). Significantly enriched gene sets (nodes) are depicted (P-value >0.005, FDR Q-value >0.1, overlap cutoff 0.5), edges (green lines) represent common genes. (C) Enrichment plot as described in B) but using C2.CP gene set collection of canonical pathways.

**Supplementary Figure S7: Expression of FANCD2 and RAD18 during the cell cycle**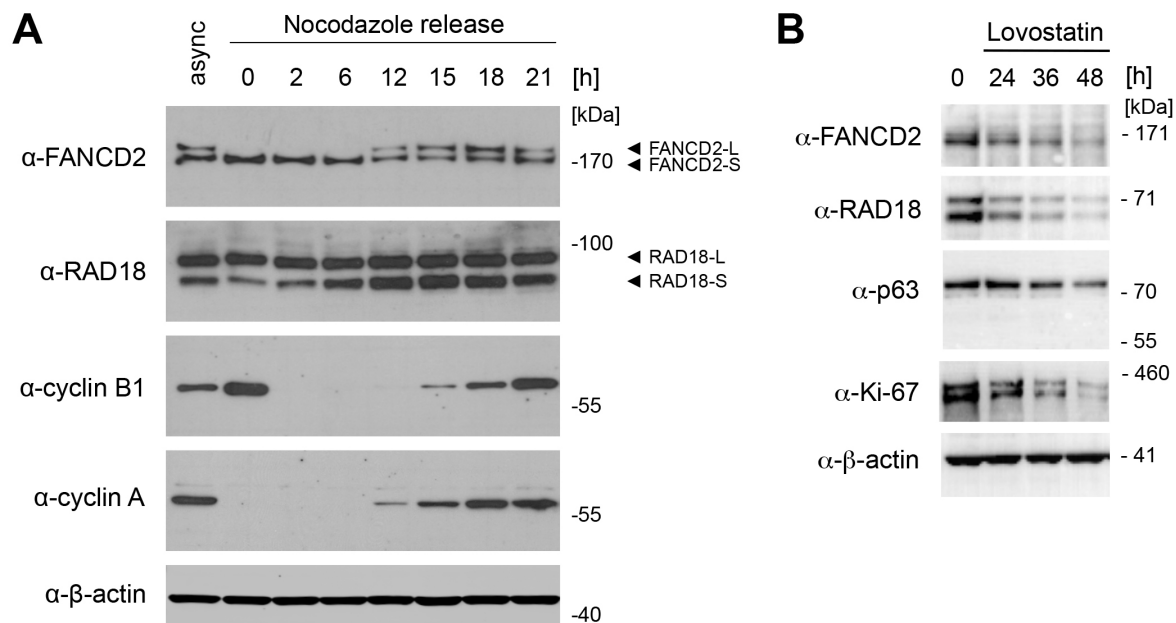

(A) UT-SCC-74A were treated with nocodazole [100 ng/ml] for 18 h to induce a G2/M arrest. Mitotic cells were detached by shake-off and re-plated in fresh growth medium without nocodazole. To analyze protein expression during the cell cycle, cells were harvested at indicated time points after release from nocodazole and analyzed by Western Blot. Only the mono-ubiquitinated form of FANCD2 (FANCD2-L) is regulated in a cell cycle-dependent manner without affecting basal levels of unmodified FANCD2 and RAD18. Cyclin B1 and cyclin A are shown as indicators for G2/M and S-phase, respectively.

(B) UT-SCC-74A cell were treated with lovastatin [20  $\mu$ M] resulting in progressive exit from the cell cycle (G0 arrest). To analyze protein expression when cells were undergoing arrest, cells were harvested at indicated time points and analyzed by Western Blot for expression of FANCD2 and RAD18. Ki-67 was analyzed as a marker for non-G0 cells. Expression of p63 was measured in parallel, revealing concomitant downregulation of FANCD2, RAD18 and p63 upon cell cycle exit.

$\beta$ -actin: loading control. -L: long isoform, -S: short isoform.

**Supplementary Figure S8: Enhancer-associated histone modifications of the *FANCD2* -10kb region**

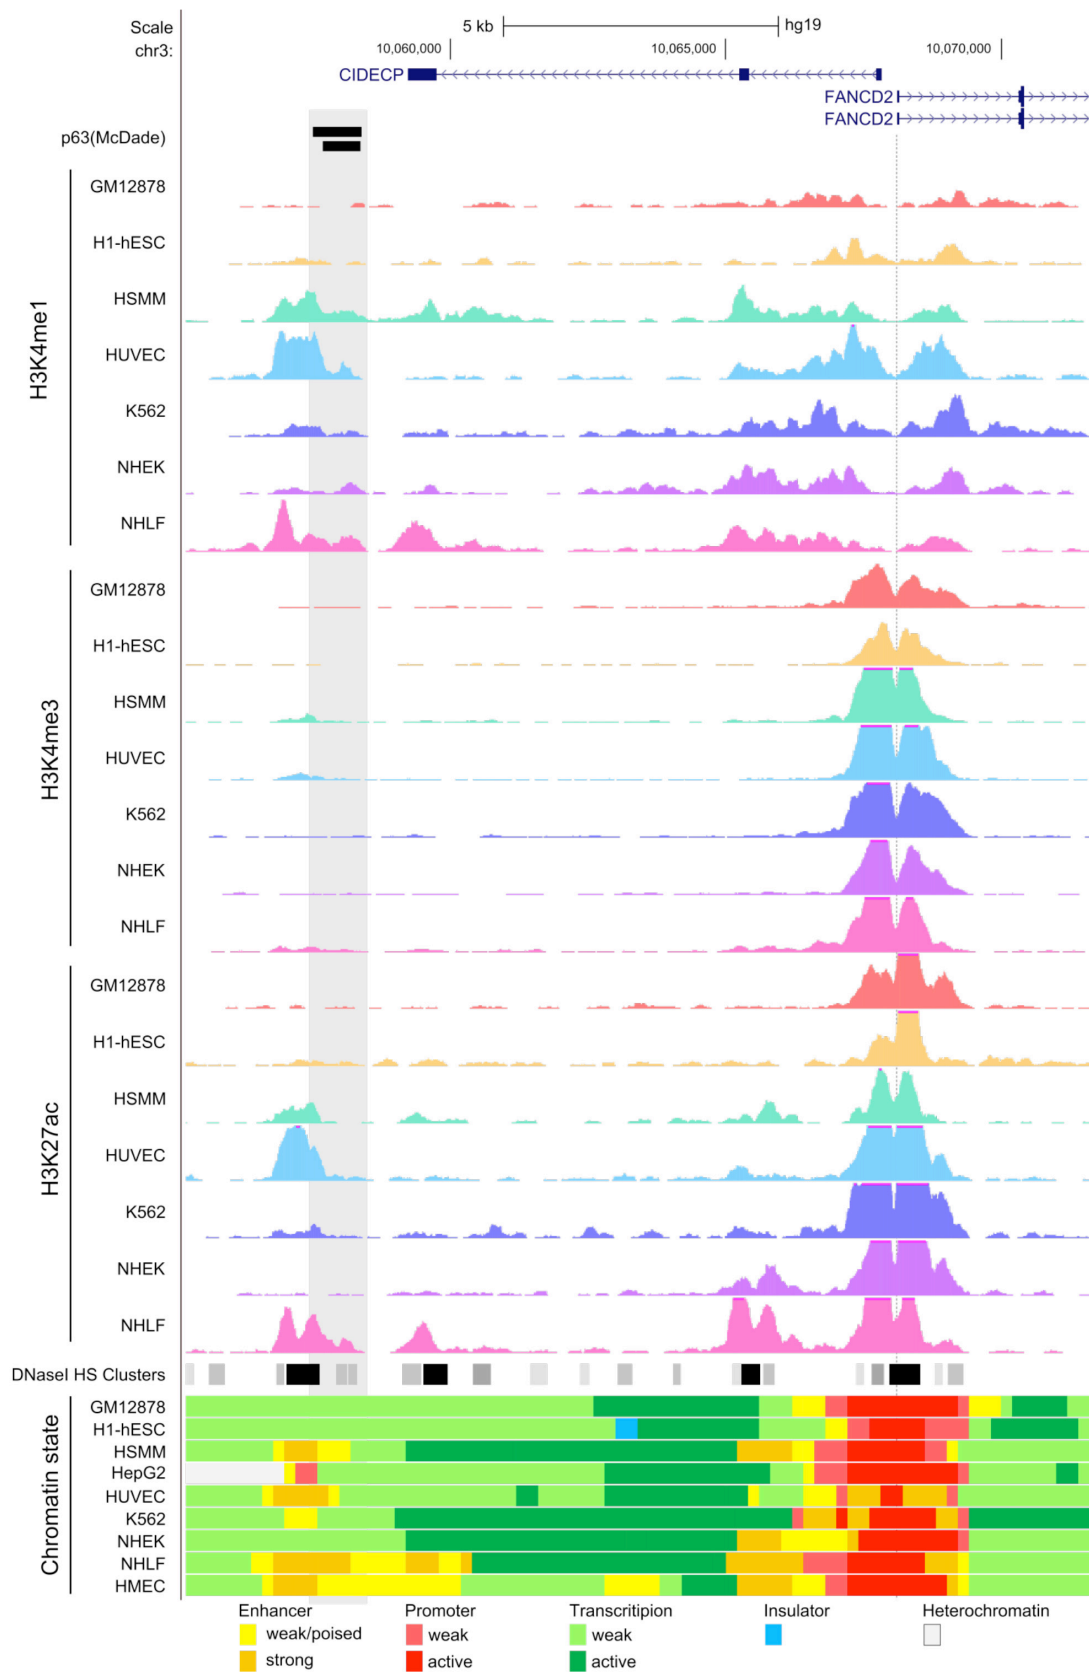

The *FANCD2* -10kb upstream region was analyzed for its chromatin state using publicly available data sets from the Encyclopedia of DNA elements (ENCODE) (4, 5). UCSC genome browser view shows read alignments from ChIPseq of the histone modifications H3K4me1, H3K4me3 and H3K27ac in indicated cell lines (6). DNase I hypersensitive (HS) clusters of 125 cell types and chromatin states of selected cell lines are illustrated below. Peaks of p63-bound sites identified by McDade et al. (7) are indicated as black bars above the plots. *FANCD2* transcription start site (dashed line) and p63-bound -10kb enhancer region (grey rectangle) are highlighted.

NHEK: primary normal human epidermal keratinocytes.

**Supplementary Figure S9: Ectopic expression of FANCD2 is not sufficient to rescue  $\Delta$ Np63-depleted cells from cisplatin-induced cell death**

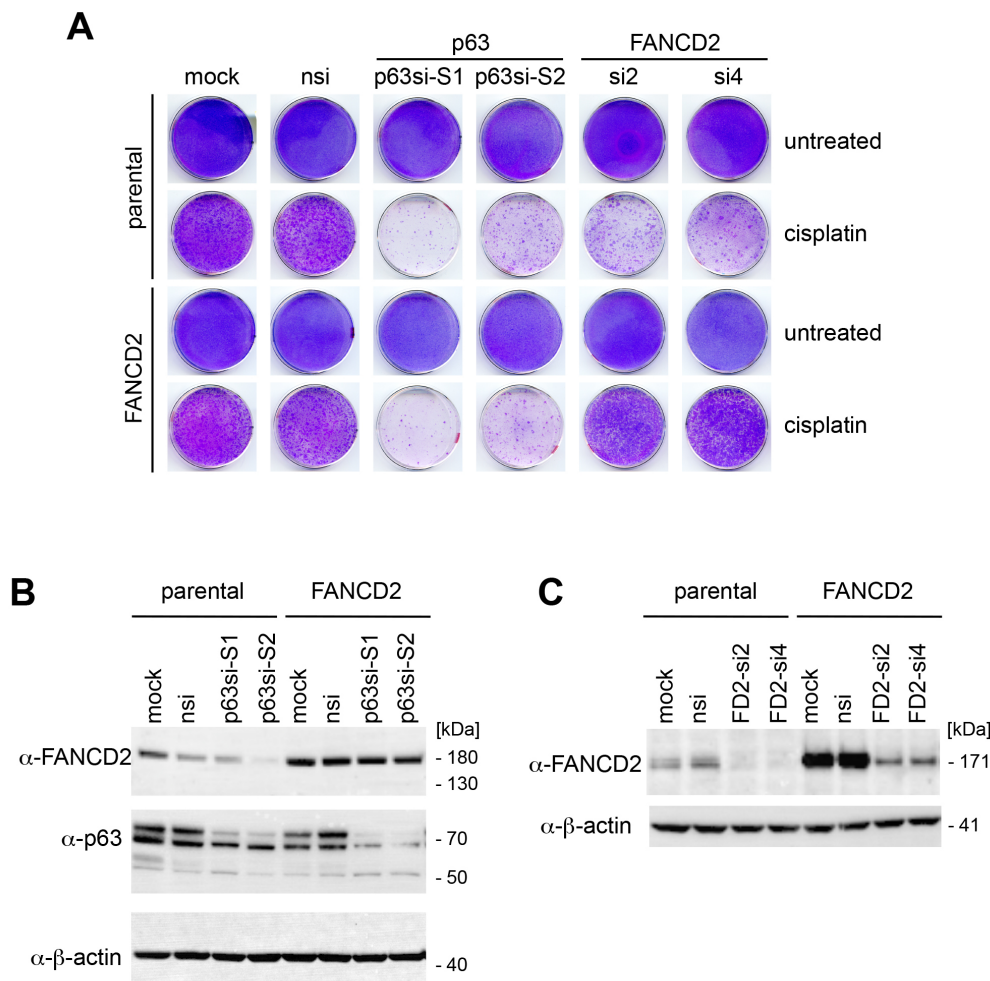

UT-SCC-74A cells were stably transduced with FANCD2 expressing lentiviruses. **(A)** Parental and FANCD2-transduced cells were transfected with the two p63-targeting siRNAs p63si-S1 and p63si-S2, respectively. Two independent FANCD2-targeting siRNAs (FD2-si2 and FD2-si4) served as a positive control. Non-targeting siRNA (nsi) and mock-transfected cells were included as negative controls. Colony formation of cells with or without 24-h cisplatin treatment [2  $\mu$ M] was measured after 10 days. FANCD2-depleted cells were treated with 1  $\mu$ M cisplatin because of higher cisplatin sensitivity. Efficient rescue of FANCD2-depleted cells from cisplatin-induced cell death by ectopically expressed FANCD2 validates the functionality of transfected FANCD2. **(B)** Overexpression and knockdown of FANCD2 and p63 were validated by Western blot.  $\beta$ -actin: loading control.

**Supplementary Figure S10: Ectopic expression of FANCD2 is not sufficient to sustain proliferation of  $\Delta$ Np63-depleted cells**

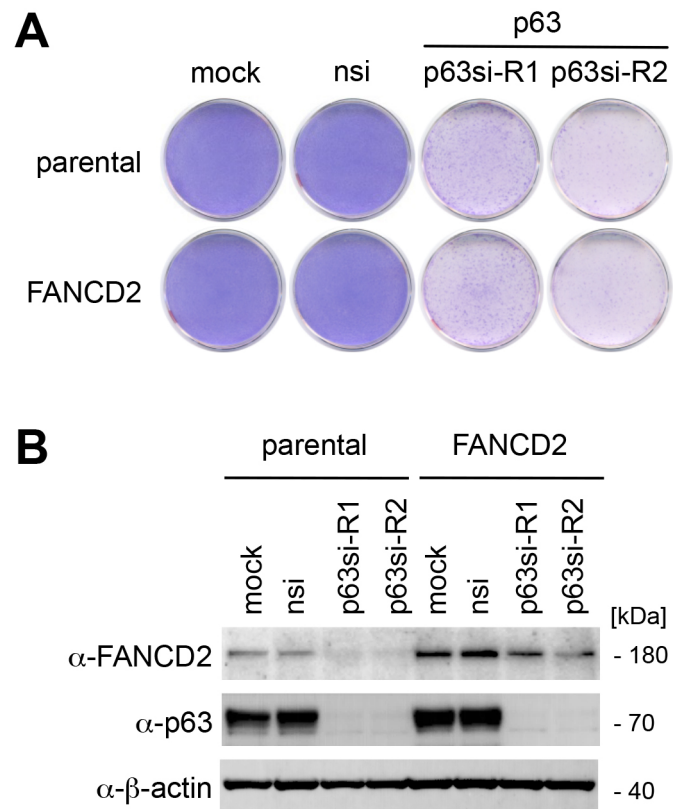

UT-SCC-74A cells were stably transduced with FANCD2 expressing lentiviruses. **(A)** Parental and FANCD2-transduced cells were transfected with the two siRNAs p63si-R1 and p63si-R2, respectively. Non-targeting siRNA (nsi) and mock-transfected cells were included as negative controls. Colony formation of cells was measured after 10 days. **(B)** Overexpression of FANCD2 and knockdown of p63 were validated by Western blot.  $\beta$ -actin: loading control.

### Supplementary Figure S11: Depletion of multiple FA pathway components sensitizes SCC cells to cisplatin

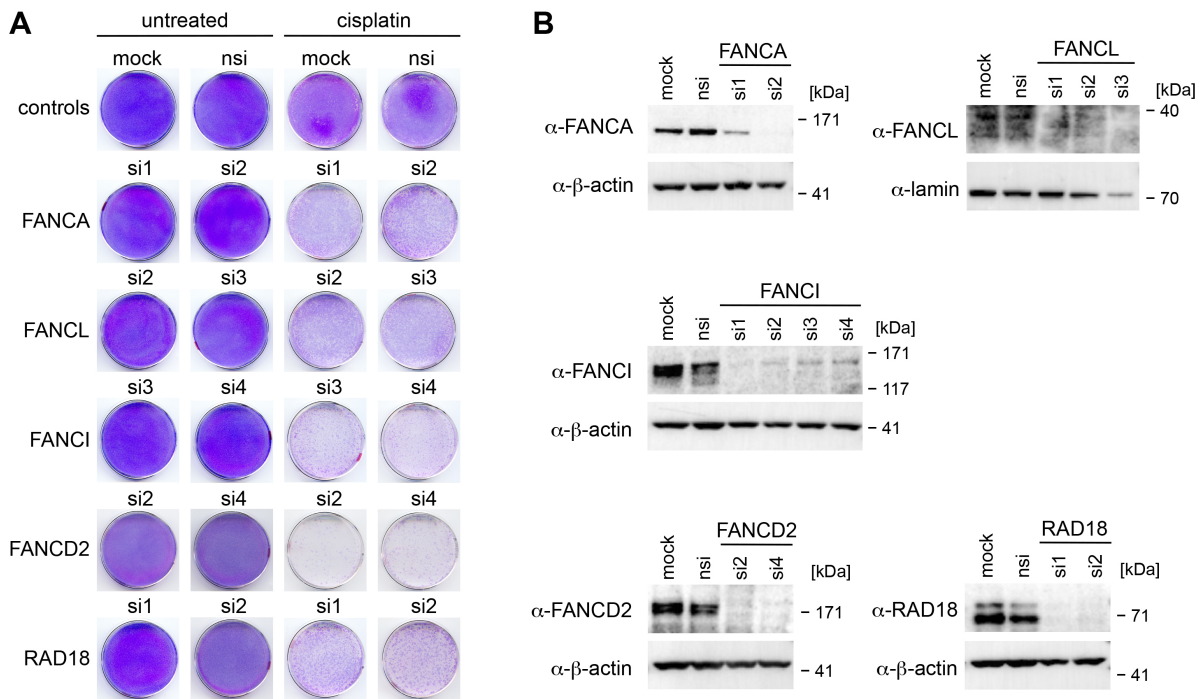

UT-SCC-74A cells were transfected with siRNAs targeting FANCA, FANCL, FANCI, FANCD2 and RAD18. Non-targeting siRNA (nsi) and mock-transfected cells were included as negative controls. **(A)** Colony formation of cells with or without 24-h cisplatin treatment [2  $\mu$ M] was measured after 10 days. **(B)** Knock-down efficiencies were validated by Western blot.  $\beta$ -actin, lamin: loading controls.



## SUPPLEMENTARY METHODS

## siRNA

siRNAs were provided by Dharmacon and Qiagen.

| Name / Gene       | siRNA # | target sequence            | modification <sup>1</sup> | supplier  |
|-------------------|---------|----------------------------|---------------------------|-----------|
| nsi <sup>2</sup>  | nsi-1   | UGGUUUACAUGUCGACUAA        | OTP                       | Dharmacon |
|                   | nsi-2   | UGGUUUACAUGUUGUGUGA        | OTP                       | Dharmacon |
|                   | nsi-3   | UGGUUUACAUGUUUUCUGA        | OTP                       | Dharmacon |
|                   | nsi-4   | UGGUUUACAUGUUUCCUA         | OTP                       | Dharmacon |
| p63si-S1          |         | GGGUGAGCGUGUUUAUGAUGC<br>U | OTP                       | Dharmacon |
| p63si-S2          |         | AGAAAGAGAGAGAGGGACU        | OTP                       | Dharmacon |
| p63si-R1          |         | GGACAGCAGCAUUGAUCAA        | siG                       | Dharmacon |
| p63si-R2          |         | CGACAGUCUUGUACAAUUU        | siG                       | Dharmacon |
| p63si1            |         | AACUGAAGAAACUCUACUGCC      | HPP                       | Qiagen    |
| p73si5            |         | GCAAGCAGCCCAUCAAGGA        | OTP                       | Dharmacon |
| FANCA             | si1     | GCAGGUCACGGUUGAUGUA        | OTP                       | Dharmacon |
|                   | si2     | GUUAGAGUUUGCUCAGUAU        | OTP                       | Dharmacon |
| FANCD2            | si1     | UGGAUAAGUUGUCGUCUAU        | OTP                       | Dharmacon |
|                   | si2     | CAACAUACCUCGACUCAUU        | OTP                       | Dharmacon |
|                   | si3     | GGAUUUACCUGUGAUAAUA        | OTP                       | Dharmacon |
|                   | si4     | GGAGAUUGAUGGUCUACUA        | OTP                       | Dharmacon |
| FANCI             | si1     | ACAGAGUGGUGACGAGCUA        | OTP                       | Dharmacon |
|                   | si2     | GCAGAAAGAAAUAGCGUCU        | OTP                       | Dharmacon |
|                   | si3     | GAUACUUGUCCUUCGGAAA        | OTP                       | Dharmacon |
|                   | si4     | ACGAAGACCUAGAUGAUAU        | OTP                       | Dharmacon |
| FANCL             | si1     | GCGGAUACCUGCUUCAGUA        | OTP                       | Dharmacon |
|                   | si2     | AGUGUUGCCUGAAGAUUUA        | OTP                       | Dharmacon |
|                   | si3     | GCAAUAGAAUCACUAAAGG        | OTP                       | Dharmacon |
| PLK1 <sup>2</sup> | si9     | GCACAUACCGCCUGAGUCU        | OTP                       | Dharmacon |
|                   | si10    | CCACCAAGGUUUUCGAUUG        | OTP                       | Dharmacon |
|                   | si11    | GCUCUCAAUGACUCAACA         | OTP                       | Dharmacon |
|                   | si12    | UCUCAAGGCCUCCUAAUAG        | OTP                       | Dharmacon |
| RAD18             | si1     | CAUAAUAGAUGAACUGGUA        | siG                       | Dharmacon |
|                   | si2     | GAUAAUAUGACCUCAGUAA        | siG                       | Dharmacon |

<sup>1</sup> Modifications: siG siGenome, OTP ON-TARGET<sup>plus</sup>, HPP

<sup>2</sup> Used as siRNA pool of four different siRNAs.

**Antibodies**

| <b>Name</b>                       | <b>application</b> | <b>Clone / order no.</b> | <b>source</b>            |
|-----------------------------------|--------------------|--------------------------|--------------------------|
| <b>β-actin</b>                    | WB                 | AC-15 / ab6276           | Abcam                    |
| <b>ΔNp73</b>                      | WB                 | EP051710                 | Eurogentec               |
| <b>γH2AX (pS139)</b>              | IF, WB             | - / ab11174              | Abcam                    |
| <b>cyclin A</b>                   | WB                 | C-19 / sc-596            | Santa Cruz Biotechnology |
| <b>cyclin B1</b>                  | WB                 | GNS1 / sc-245            | Santa Cruz Biotechnology |
| <b>p53</b>                        | WB                 | DO1 / -                  | B. Vojtesek              |
| <b>p63</b>                        | ChIP, IF, WB       | 4A4 / sc-8431            | Santa Cruz Biotechnology |
| <b>p63</b>                        | IHC                | 4A4 / 559951             | BD Pharmingen            |
| <b>FANCA</b>                      | WB                 | - / A301-908A            | Bethyl Lab.              |
| <b>FANCD2</b>                     | WB                 | FI17 / sc-20022          | Santa Cruz Biotechnology |
| <b>FANCD2</b>                     | IHC                | - / ab111269             | Abcam                    |
| <b>FANCI</b>                      | WB                 | - / A301-254A            | Bethyl Lab.              |
| <b>FANCL</b>                      | WB                 | H-197 / sc-66887         | Santa Cruz Biotechnology |
| <b>H3K4me1</b>                    | ChIP               | - / ab8895               | Abcam                    |
| <b>H3K4me3</b>                    | ChIP               | - / ab8580               | Abcam                    |
| <b>H3K27ac</b>                    | ChIP               | - / ab4729               | Abcam                    |
| <b>HA-tag</b>                     | EMSA               | 16B12 / MMS-101R         | Covance                  |
| <b>Ki-67</b>                      | WB                 | - / ab15580              | Abcam                    |
| <b>mouse IgG (normal)</b>         | ChIP               | - / 12-371               | Merck Millipore          |
| <b>mouse IgG-HRP</b>              | WB                 | - / NA9310               | GE Healthcare            |
| <b>mouse IgG-Alexa Fluor 488</b>  | IF                 | - / A11029               | Molecular Probes         |
| <b>mouse IgG-Alexa Fluor 647</b>  | IF                 | - / A21236               | Molecular Probes         |
| <b>Pt-[GG]</b>                    | IF                 | R-C18 / -                | Thomale J. (2, 8)        |
| <b>rabbit IgG (normal)</b>        | ChIP               | - / sc.2027              | Santa Cruz Biotechnology |
| <b>rabbit IgG-HRP</b>             | WB                 | - / NA9340               | GE Healthcare            |
| <b>rabbit IgG-Alexa Fluor 488</b> | IF                 | - / A11008               | Molecular Probes         |
| <b>rabbit IgG-Alexa Fluor 647</b> | IF                 | - / A-21057              | Molecular Probes         |
| <b>rat IgG-Cy3</b>                | IF                 | - / 312-165-003          | Dianova                  |
| <b>mouse IgG-Biotin</b>           | IHC                | - / EO46401              | Dako                     |
| <b>rabbit IgG-Biotin</b>          | IHC                | - / EO43201              | Dako                     |

|                    |     |                     |             |
|--------------------|-----|---------------------|-------------|
| <b>RAD18</b>       | WB  | - / ab79763         | Abcam       |
| <b>RAD18</b>       | IHC | 3H7 / H00056852-M01 | Abnova      |
| <b>RPA32, pS33</b> | IF  | - / A300-246A       | Bethyl Lab. |
| <b>TAp73</b>       | WB  | - / A300-126A       | Bethyl Lab. |
| <b>USP1</b>        | WB  | - / A301-700A       | Bethyl Lab. |

### Oligonucleotides

| Gene / Region                       | Application               | sense sequence                    | anti-sense sequence               |
|-------------------------------------|---------------------------|-----------------------------------|-----------------------------------|
| <b>28S</b>                          | qPCR                      | CCTGAGCGCAAGTACTCTGTGT            | GCTGATCCACATCTGCTGGA              |
| <b><math>\beta</math>-actin</b>     | qPCR                      | TTGAAAATCCGGGGGAGAG               | ACATTGTTCCAACATGCCAG              |
| <b><math>\Delta</math>Np63</b>      | qPCR                      | GGAGCCAGAAGAAAGGACAGCAGC          | CCAGGTTCGTGTACTGTGGCTCA           |
| <b>FANCA</b>                        | qPCR                      | AAAAATGCCGCAGGTCACG               | CCTGTACTCCAGCAGCCAA               |
| <b>FANCB</b>                        | qPCR                      | TTCGGGAATTACGGCAGCAT              | GACATTCCTTCTCCTCTGCACT            |
| <b>FANCC</b>                        | qPCR                      | ACACTCAAAGGCGAATGGCT              | GGGGTCAACATCTGTCAGGG              |
| <b>FANCD2</b>                       | qPCR                      | GGAACTACTCAGCCAGAGCGTCCA          | CCCCTTGGCCACACCCGAC               |
| <b>RAD18</b>                        | qPCR                      | TCTGTATGCATGGGACAGGA              | TCAGGTTCCAATTCCTCTGG              |
| <b>USP1</b>                         | qPCR                      | GGTTGAACAGCTCCAGGCTA              | AGGGTTGAGTCCCTCAGTG               |
| <b>FANCD2 -10kb</b>                 | ChIP                      | GCTGTCTGGCAAGTTAGGATGG            | CAAGCTGTAAGGCATTTCCCG             |
| <b>FANCD2 TSS</b>                   | ChIP                      | GGAAAGTCGAAAACACTACGGC            | TCGAGAGACTACGACCATTGC             |
| <b>control site (CDKN1A +11443)</b> | ChIP                      | TCTGTCTCGGCAGCTGACAT              | AACACAAAAGATCAAGGTGAGTGA          |
| <b>FANCD2 -10kb_WT</b>              | EMSA                      | GGGATTACAGGCATGAGCCAGCACGCCAGCCC  | GGGCTGGGCGTGCTGGCTCATGCCTGTAATCCC |
| <b>FANCD2 -10kb_MUT</b>             | EMSA                      | GGGATTATAGTTATTAGTCACTACTCCCAGCCC | GGGCTGGGAGTAATGACTATAACTATAATCCC  |
| <b>FANCD2 -10kb_WT-scrambled</b>    | EMSA                      | GGGGTTAAACGGCGCCATACCACCGACGAGCCC | GGGCTCGTCGGTGGTATGGCGCCGTTAACCCC  |
| <b>FANCD2 -10kb_MUT-scrambled</b>   | EMSA                      | GGGGATTATTAATCGTCTACATAGATTCTCCCC | GGGAGAAATCTATGTAGACGATTAATAATCCC  |
| <b>FANCD2 -10kb_WT</b>              | Luciferase reporter assay | GATCATTACAGGCATGAGCCAGCACGCC      | GATCGGGCGTGCTGGCTCATGCCTGTAAT     |
| <b>FANCD2 -10kb_MUT</b>             | Luciferase reporter assay | GATCATTATAGTTATTAGTCACTACTCCC     | GATCGGGAGTAATGACTATAACTATAAT      |

**SUPPLEMENTARY REFERENCES**

1. Subramanian,A., Tamayo,P., Mootha,V.K., Mukherjee,S., Ebert,B.L., Gillette,M.A., Paulovich,A., Pomeroy,S.L., Golub,T.R., Lander,E.S., *et al.* (2005) Gene set enrichment analysis: a knowledge-based approach for interpreting genome-wide expression profiles. *Proc Natl Acad Sci USA*, **102**, 15545–15550.
2. Liberzon,A., Subramanian,A., Pinchback,R., Thorvaldsdottir,H., Tamayo,P. and Mesirov,J.P. (2011) Molecular signatures database (MSigDB) 3.0. *Bioinformatics*, **27**, 1739–1740.
3. Merico,D., Isserlin,R., Stueker,O., Emili,A. and Bader,G.D. (2010) Enrichment map: a network-based method for gene-set enrichment visualization and interpretation. *PLoS ONE*, **5**, e13984.
4. ENCODE Project Consortium (2011) A user's guide to the encyclopedia of DNA elements (ENCODE). *PLoS Biol*, **9**, e1001046.
5. Ernst,J., Kheradpour,P., Mikkelsen,T.S., Shores,N., Ward,L.D., Epstein,C.B., Zhang,X., Wang,L., Issner,R., Coyne,M., *et al.* (2012) Mapping and analysis of chromatin state dynamics in nine human cell types. *Nature*, **473**, 43–49.
6. Rosenbloom,K.R., Armstrong,J., Barber,G.P., Casper,J., Clawson,H., Diekhans,M., Dreszer,T.R., Fujita,P.A., Guruvadoo,L., Haeussler,M., *et al.* (2015) The UCSC Genome Browser database: 2015 update. *Nucleic Acids Res*, **43**, D670–81.
7. McDade,S.S., Patel,D., Moran,M., Campbell,J., Fenwick,K., Kozarewa,I., Orr,N.J., Lord,C.J., Ashworth,A.A. and McCance,D.J. (2014) Genome-wide characterization reveals complex interplay between TP53 and TP63 in response to genotoxic stress. *Nucleic Acids Res*, **42**, 6270–6285.
8. Liedert,B. (2006) Adduct-specific monoclonal antibodies for the measurement of cisplatin-induced DNA lesions in individual cell nuclei. *Nucleic Acids Res*, **34**, e47–e47.
